# Supplementary material
Source: ML conference proceedings conference paper supplement (https://openreview.net/forum?id=GOt2kP383R)
Supplement: supplementary_material [file attachment]

---

# OVERCOMING DISTRIBUTION MISMATCH IN QUANTIZING IMAGE SUPER-RESOLUTION NETWORKS

**Anonymous authors**

Paper under double-blind review

In this supplementary material, we present the implementation details of our training framework, ODM in Section S1; additional experimental results in Section S2; additional ablation study in Section S3; additional qualitative results in Section S4; [additional analyses in Section S5](#).

## S1 IMPLEMENTATION DETAILS

$\lambda_V$ , the balance weight between reconstruction loss and variance regularization loss, is set differently based on the backbone model. We set  $\lambda_V$ , as  $1 \times 10^{-4}$  for EDSR and SRResNet, and  $1 \times 10^{-5}$  for RDN, which is a larger model with more convolutional layers than EDSR and SRResNet. Since  $\mathcal{L}_V$  is sum of the variances in features of all the convolutional layers, it is natural to leverage smaller  $\lambda_V$  for larger models.

## S2 ADDITIONAL EXPERIMENTS

In addition to the evaluations done in the main manuscript on representative SR networks, we evaluate our framework on lightweight SR models. As shown in Table S1, our framework achieves consistent gain over existing methods in both CARN ([Ahn et al., 2018](#)) and SwinIR ([Liang et al., 2021](#)) backbones.

| Model                   | Bit | Set5         | Set14        | B100         | Urban100     |
|-------------------------|-----|--------------|--------------|--------------|--------------|
| CARN                    | 32  | 32.14        | 28.61        | 27.58        | 26.07        |
| CARN-PAMS               | 4   | 31.17        | 28.00        | 27.16        | 25.08        |
| CARN-DDTB               | 4   | 31.70        | 28.30        | 27.37        | 25.54        |
| CARN-ODM (Ours)         | 4   | <b>31.91</b> | <b>28.42</b> | <b>27.47</b> | <b>25.79</b> |
| SwinIR-light            | 32  | 32.44        | 28.77        | 27.69        | 26.47        |
| SwinIR-light-PAMS       | 4   | 31.99        | 28.50        | 27.49        | 25.86        |
| SwinIR-light-DDTB       | 4   | 32.09        | 28.55        | 27.54        | 26.01        |
| SwinIR-light-ODM (Ours) | 4   | <b>32.21</b> | <b>28.63</b> | <b>27.58</b> | <b>26.18</b> |

Table S1: **Evaluation on CARN and SwinIR-light** of scale 4. For fair comparison, each quantized model is updated for 60 epochs

Also, along with the results of the main manuscript done on SR networks of scale  $\times 4$ , we evaluate our framework on networks of scale  $\times 2$ . As shown in Table S2, our framework outperforms existing SR quantization methods in terms of both PSNR and SSIM, demonstrating the effectiveness of our approach on scale 2 SR networks. Specifically, the PSNR gain on Set5 is 0.37 dB on EDSR and 0.37 dB on RDN, while it is 0.06 dB on SRResNet, as the distribution mismatch problem is particularly trivial for SRResNet.

Moreover, we compare our method with fully-quantized SR networks, EDSR-FQSR [40], which quantizes all layers and also the skip-connections. To make a fair comparison, we also quantize all convolutional layers and the skip-connections. In Table S3, the results demonstrate that ODM is also effective when the network is fully quantized.

| Model               | Bit | Set5         |              | Set14        |              | B100         |              | Urban100     |              |
|---------------------|-----|--------------|--------------|--------------|--------------|--------------|--------------|--------------|--------------|
|                     |     | PSNR         | SSIM         | PSNR         | SSIM         | PSNR         | SSIM         | PSNR         | SSIM         |
| EDSR                | 32  | 37.93        | 0.960        | 33.46        | 0.916        | 32.10        | 0.899        | 31.71        | 0.925        |
| EDSR-PAMS           | 2   | 35.30        | 0.946        | 31.63        | 0.899        | 30.66        | 0.879        | 28.11        | 0.875        |
| EDSR-DDTB           | 2   | 37.25        | 0.958        | 32.87        | 0.911        | 31.67        | 0.893        | 30.34        | 0.910        |
| EDSR-ODM (Ours)     | 2   | <b>37.62</b> | <b>0.959</b> | <b>33.14</b> | <b>0.914</b> | <b>31.88</b> | <b>0.896</b> | <b>30.92</b> | <b>0.917</b> |
| RDN                 | 32  | 38.05        | 0.961        | 33.59        | 0.917        | 32.20        | 0.900        | 32.13        | 0.927        |
| RDN-PAMS            | 2   | 35.45        | 0.946        | 31.67        | 0.899        | 30.69        | 0.879        | 28.14        | 0.874        |
| RDN-DDTB            | 2   | 36.76        | 0.955        | 32.54        | 0.908        | 31.44        | 0.890        | 29.77        | 0.903        |
| RDN-ODM (Ours)      | 2   | <b>37.13</b> | <b>0.957</b> | <b>32.69</b> | <b>0.910</b> | <b>31.53</b> | <b>0.892</b> | <b>29.92</b> | <b>0.904</b> |
| SRResNet            | 32  | 37.89        | 0.960        | 33.40        | 0.916        | 32.08        | 0.898        | 31.60        | 0.923        |
| SRResNet-PAMS       | 2   | 34.75        | 0.942        | 31.31        | 0.896        | 30.48        | 0.877        | 27.86        | 0.868        |
| SRResNet-DDTB       | 2   | 37.46        | 0.958        | 33.02        | 0.913        | 31.78        | 0.895        | 30.57        | 0.913        |
| SRResNet-ODM (Ours) | 2   | <b>37.52</b> | <b>0.959</b> | <b>33.02</b> | <b>0.913</b> | <b>31.79</b> | <b>0.895</b> | <b>30.55</b> | <b>0.913</b> |

Table S2: Quantitative comparisons on SR networks of scale  $\times 2$ .

| Scale      | Model           | Bit | S.C. | Set5         |              | Set14        |              | B100         |              | Urban100     |              |
|------------|-----------------|-----|------|--------------|--------------|--------------|--------------|--------------|--------------|--------------|--------------|
|            |                 |     |      | PSNR         | SSIM         | PSNR         | SSIM         | PSNR         | SSIM         | PSNR         | SSIM         |
| $\times 4$ | EDSR [33]       | 32  | 32   | 32.10        | 0.894        | 28.58        | 0.781        | 27.56        | 0.736        | 26.04        | 0.785        |
|            | EDSR-FQSR [40]  | 4   | 8    | 30.93        | 0.870        | 27.82        | 0.761        | 27.07        | 0.715        | 24.93        | 0.744        |
|            | EDSR-DDTB [48]  | 4   | 8    | 31.91        | 0.889        | 28.40        | 0.777        | 27.44        | 0.732        | 25.70        | 0.775        |
|            | EDSR-ODM (Ours) | 4   | 8    | <b>32.02</b> | <b>0.891</b> | <b>28.46</b> | <b>0.778</b> | <b>27.48</b> | <b>0.734</b> | <b>25.76</b> | <b>0.777</b> |
| $\times 2$ | EDSR [33]       | 32  | 32   | 37.93        | 0.960        | 33.46        | 0.916        | 32.10        | 0.899        | 31.71        | 0.925        |
|            | EDSR-FQSR [40]  | 4   | 8    | 37.04        | 0.951        | 32.84        | 0.908        | 31.67        | 0.889        | 30.65        | 0.911        |
|            | EDSR-DDTB [48]  | 4   | 8    | 37.83        | 0.960        | 33.44        | 0.916        | 32.07        | 0.898        | 31.60        | 0.924        |
|            | EDSR-ODM (Ours) | 4   | 8    | <b>37.87</b> | <b>0.960</b> | <b>33.43</b> | <b>0.915</b> | <b>32.10</b> | <b>0.899</b> | <b>31.75</b> | <b>0.925</b> |

Table S3: Quantitative comparisons on EDSR with fully quantized methods. S.C. refers to the bit-width of skip-connections.

### S3 ADDITIONAL ABLATION STUDY

According to the ablation on offset ratio  $p$  of Table S4a, we found that 0.3 is a reasonable value among different ratios. This is because as larger  $p$  gives minimal or no accuracy gain but at the cost of additional parameters. Also, for ablation on the balancing weight  $\lambda$  in Table S4b, we follow PAMS and DDTB for using 1000. Nevertheless, we added ablations on different  $\lambda$  values. The results justify our selection on 1000 as the balancing weight.

| $p$        | Set5  | Set14 | B100  | Urban100 | $\lambda$   | Set5  | Set14 | B100  | Urban100 |
|------------|-------|-------|-------|----------|-------------|-------|-------|-------|----------|
| 0.1        | 31.48 | 28.11 | 27.26 | 25.14    | 10          | 31.44 | 28.11 | 27.26 | 25.14    |
| <b>0.3</b> | 31.49 | 28.12 | 27.26 | 25.15    | 100         | 31.46 | 28.11 | 27.26 | 25.14    |
| 0.5        | 31.47 | 28.13 | 27.27 | 25.17    | <b>1000</b> | 31.49 | 28.12 | 27.26 | 25.15    |
| 1.0        | 31.49 | 28.16 | 27.27 | 25.17    |             |       |       |       |          |

(a) Ablation on  $p$

(b) Ablation on  $\lambda$

Table S4: Ablation on hyperparameters on EDSR  $\times 4$  (2-bit).

### S4 ADDITIONAL QUALITATIVE RESULTS

We show more visual comparisons in Figure S1. Overall, while other methods suffer from blurred lines or damaged structures in test images (Urban100), our approach produces further clear lines and structures. These results demonstrate that our ODM is beneficial quantitatively and qualitatively.

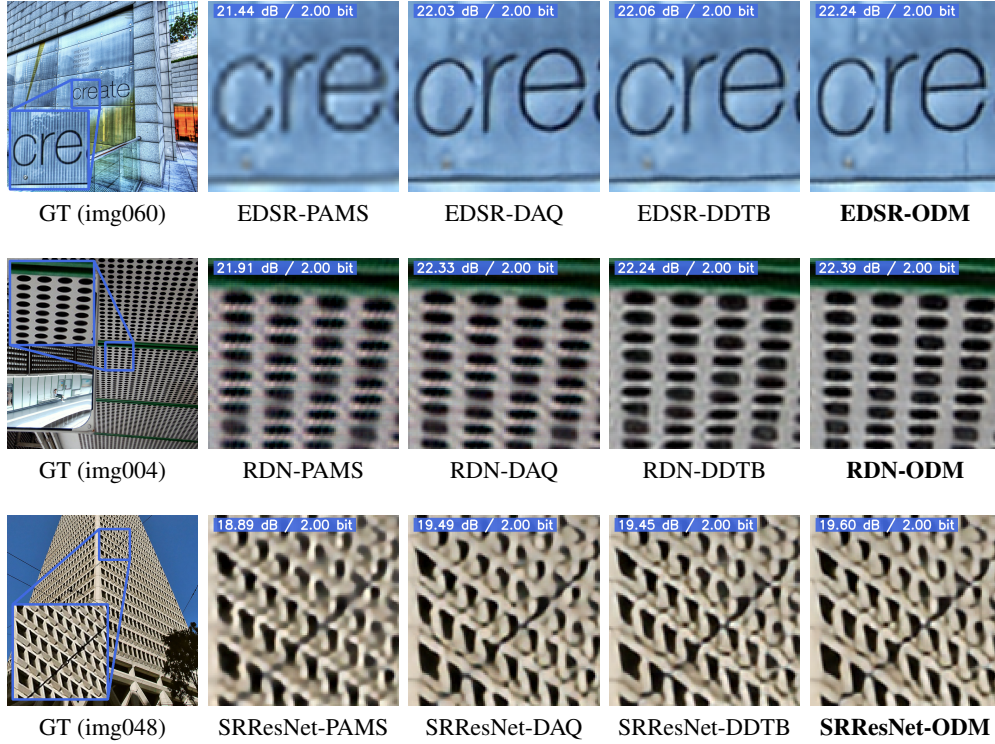

Figure S1: **Qualitative results** on EDSR, RDN, and SRResNet of scale 4.

## S5 ADDITIONAL ANALYSES

### S5.1 DISTRIBUTION MISMATCH

The distribution mismatch problem is especially severe for SR networks. For example, as reported in Table S5, the classification network (ResNet20) shows a much more minor image-wise and channel-wise distribution mismatch compared to SR networks (EDSR, RDN).

| Model               | Image-wise Variance | Channel-wise Variance |
|---------------------|---------------------|-----------------------|
| EDSR ( $\times 4$ ) | 15.08               | 40.29                 |
| RDN ( $\times 4$ )  | 6.40                | 58.14                 |
| ResNet-20           | 0.04                | 0.09                  |

Table S5: **Average feature mismatch** on EDSR, RDN  $\times 4$ , and ResNet-20. The metrics are measured on DIV2K validation set for SR networks and ImageNet validation set for the classification network.

Also, we visualize the distribution mismatch after using our framework, ODM, before and after quantization. Figure S2 demonstrates that ODM effectively reduces the distribution mismatch, pushing the network towards a quantization-robust grid.

### S5.2 GRADIENT CONFLICT

We define gradient conflict when the sign of gradient from reconstruction loss and that of regularization is the opposite. In the main manuscript, we disregard the gradient of regularization when the two gradients conflict. Instead of disregarding the gradient of the regularization when the two gradients conflict, we added analysis for weighting the regularization loss by the degree of conflict between two losses (measured by the cosine similarity). According to the results in Table S6, it was slightly better to disregard the variance regularization loss when it is not cooperative.

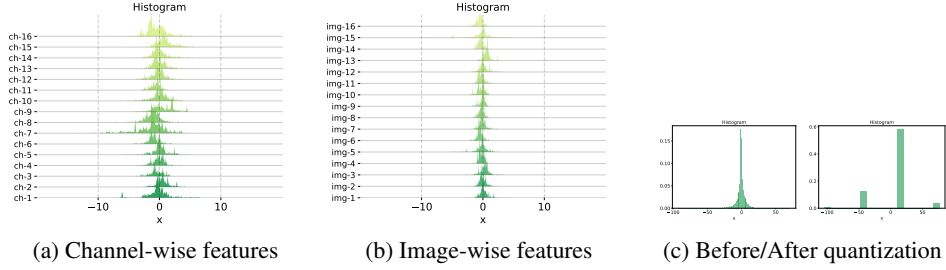

Figure S2: **Distribution mismatch after ODM is applied.** Visualization done on EDSR ( $\times 4$ ). Channels and images of a layer are randomly selected for visualization. Also, we plot the feature distribution of the second layer of EDSR before and after quantization (2-bit).

| Method                                                                  | Set5  | Set14 | B100  | Urban100 |
|-------------------------------------------------------------------------|-------|-------|-------|----------|
| VR disregarded when $\nabla_{\theta} L_R \cdot \nabla_{\theta} L_V < 0$ | 31.49 | 28.12 | 27.26 | 25.15    |
| VR weighted with $\cos(\nabla_{\theta} L_R, \nabla_{\theta} L_V)$       | 31.45 | 28.12 | 27.25 | 25.14    |

Table S6: **Analysis on the degree of gradient conflict** on EDSR  $\times 4$  (2-bit). VR denotes the variance regularization and  $\cos()$  measures cosine similarity.

#### LICENSE OF THE USED ASSETS

- DIV2K [1] dataset is publicly available for academic research purposes.
- Set5 [4], Set14 [29], BSD100 [37], Urban100 [19] datasets are made available at <https://github.com/jbhuang0604/SelfExSR>.

#### REFERENCES

- Namhyuk Ahn, Byungkong Kang, and Kyung-Ah Sohn. Fast, accurate, and lightweight super-resolution with cascading residual network. In *ECCV*, 2018.
- Jingyun Liang, Jiezhang Cao, Guolei Sun, Kai Zhang, Luc Van Gool, and Radu Timofte. Swinir: Image restoration using swin transformer. In *ICCV*, 2021.
